# Supplementary material
Source: PubMed Central journal article supplement (PMC3337710)

Role of Coupled-Dynamics in the Catalytic Activity of Prokaryotic-like Prolyl-tRNA Synthetases

Brianne Sanford<sup>†\$</sup>, Bach Cao<sup>†</sup>, James M. Johnson<sup>†</sup>, Kurt Zimmerman<sup>†</sup>, Alexander M. Strom<sup>†</sup>, Robyn M. Mueller<sup>†</sup>, Sudeep Bhattacharyya<sup>†\*</sup>, Karin Musier-Forsyth<sup>\$\*</sup>, and Sanchita Hati<sup>†\*</sup>

<sup>†</sup>Department of Chemistry, University of Wisconsin –Eau Claire, WI, 54702

<sup>\$</sup>Department of Chemistry and Biochemistry, Center for RNA Biology, The Ohio State University, Columbus, OH, 43210

\*To whom correspondence should be addressed: S.B.: phone: 715-836-2278; fax: 715-836-4979; email: [bhattas@uwec.edu](mailto:bhattas@uwec.edu); K.M.F.: phone: 614-292-2021; fax: 614-688-5402; email: [musier@chemistry.ohio-state.edu](mailto:musier@chemistry.ohio-state.edu) ; S.H.: phone: 715-836-3850; fax: 715-836-4979; email: [hatis@uwec.edu](mailto:hatis@uwec.edu).

## SUPPLEMENTAL FIGURE LEGENDS

Figure S1. a) Pre-transfer editing reaction in the presence of cognate proline by WT, G217A, and E218A Ec ProRS. The editing activity was monitored by quantifying the amount of AMP formed at 37 °C using 0.5  $\mu$ M enzyme and 30 mM proline. b) Deacylation of Ala-tRNA<sup>Pro</sup> by WT, G217A, and E218A Ec ProRS. Reactions were initiated by the addition of enzyme to a final concentration of 5  $\mu$ M (based on active site titration). Deacylation in the presence of buffer is also shown.

Figure S2. Computed RMSPs (see eq. 5 of main text) for the eigenvectors 1-10 using 5-ns simulation data. RMSPs of the PBL were obtained using the modeled structure of Ec ProRS as described in the main text; WT (black, solid line), G217A (gray, solid line) and E218A (black, broken line) Ec ProRS.

Fig. S1.

a)

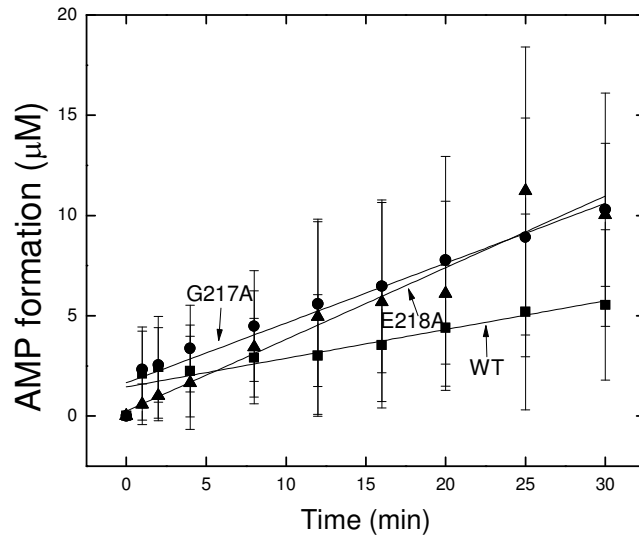

b)

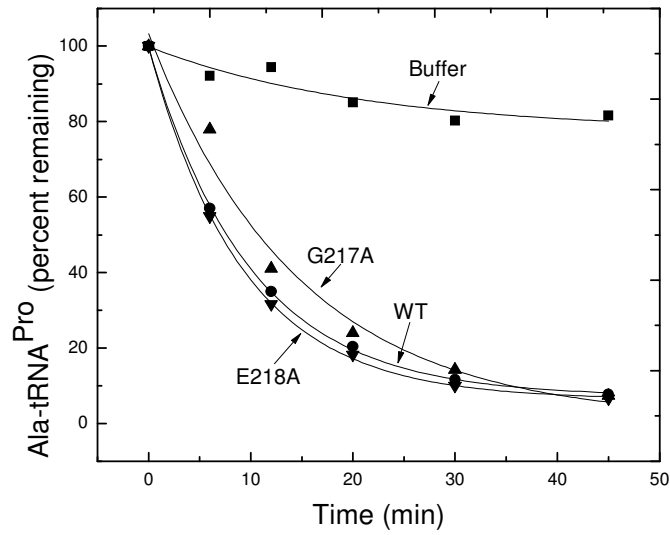

Fig. S2.

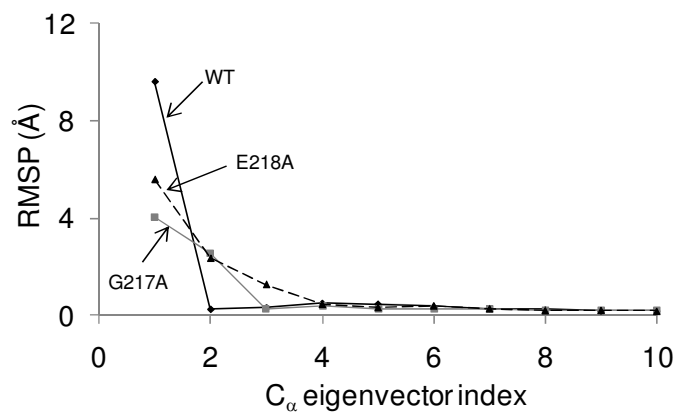

Supplement: NIHMS360350-supplement-1_si_001.pdf [file NIHMS360350-supplement-1_si_001.pdf]
